# Supplementary material for: Stabilization of the cubic, fast-ion conducting phase of Li 7 La 3 Sn 2 O 12 garnet by gallium doping
Source: Royal Society of Chemistry journal article supplement (doi:10.1039/d3ra08968a), 2024-01-01
Supplement: d3ra08968a1.pdf [file d3ra08968a1.pdf]

## Stabilization of the cubic, fast-ion conducting phase of $\text{Li}_7\text{La}_3\text{Sn}_2\text{O}_{12}$ garnet by gallium doping

Hany El-Shinawi,<sup>a,b\*</sup> Shady M. El-Dafrawy,<sup>a</sup> Mahmoud Tarek,<sup>a</sup> Ahmed F. S. Molouk,<sup>a</sup> Edmund J. Cussen<sup>b</sup> and Serena A. Cussen<sup>b</sup>

<sup>a</sup> Department of Chemistry, Faculty of Science, Mansoura University, Mansoura, 35516, Egypt.

<sup>b</sup> Department of Materials Science and Engineering, University of Sheffield, Sir Robert Hadfield Building, Sheffield, S1 3JD, UK.

### Supporting Information:

**Table S1.** Refined structural parameters from Rietveld fit against XRD data<sup>a</sup> for 0.3Ga-doped LLSO synthesized by solid-state reactions and calcined at 900 °C.

| atom             | site | occupation | x         | y         | z         | $U_{\text{iso}}$ (Å <sup>2</sup> ) |
|------------------|------|------------|-----------|-----------|-----------|------------------------------------|
| Li1 <sup>b</sup> | 24d  | 0.21(9)    | 0.375     | 0         | 0.25      | 0.11(1)                            |
| Ga <sup>b</sup>  | 24d  | 0.1        | 0.375     | 0         | 0.25      | 0.11(1)                            |
| Li2 <sup>b</sup> | 96h  | 0.455(25)  | 0.690     | 0.580     | 0.100     | 0.11(1)                            |
| La               | 24c  | 1          | 0.125     | 0         | 0.25      | 0.018(2)                           |
| Sn               | 16a  | 1          | 0         | 0         | 0         | 0.015(2)                           |
| O                | 96h  | 1          | 0.2966(7) | 0.0984(8) | 0.1941(3) | 0.007(4)                           |

<sup>a</sup> Space group  $1a\bar{3}d$ ,  $a = 12.945(3)$  Å; fit statistics:  $\chi^2 = 4.514$ ;  $wRp = 0.1181$ ,  $Rp = 0.0863$ .

<sup>b</sup> The Ga-content was fixed at 0.3 mole per unit formula of LLSO and the sum of Li1+Li2 was constrained accordingly to maintain electrical neutrality (i.e.,  $\text{Li}_{6.1}\text{Ga}_{0.3}\text{La}_3\text{Sn}_2\text{O}_{12}$ ).

$\text{Li}_2\text{SnO}_3$  was introduced as a second phase in the refinement (space group C2/c; lattice parameters  $a = 5.296(4)$  Å,  $b = 9.156(4)$  Å,  $c = 10.014(9)$  Å,  $\alpha = 90^\circ$ ,  $\beta = 100.296(8)^\circ$  and  $\gamma = 90^\circ$ ). Refined phase fraction 3.0(1) wt%.

**Table S2.** Refined structural parameters from Rietveld fit against XRD data<sup>a</sup> for 0.3Ga-doped LLSO synthesized by sol-gel method and calcined at 900 °C.

| atom             | site | occupation | x         | y         | z         | $U_{iso}$ (Å <sup>2</sup> ) |
|------------------|------|------------|-----------|-----------|-----------|-----------------------------|
| Li1 <sup>b</sup> | 24d  | 0.35(14)   | 0.375     | 0         | 0.25      | 0.09(2)                     |
| Ga <sup>b</sup>  | 24d  | 0.095      | 0.375     | 0         | 0.25      | 0.09(2)                     |
| Li2 <sup>b</sup> | 96h  | 0.425(35)  | 0.690     | 0.580     | 0.100     | 0.09(2)                     |
| La               | 24c  | 1          | 0.125     | 0         | 0.25      | 0.019(1)                    |
| Sn               | 16a  | 1          | 0         | 0         | 0         | 0.015(2)                    |
| O                | 96h  | 1          | 0.2958(6) | 0.0953(8) | 0.1980(7) | 0.010(4)                    |

<sup>a</sup> Space group  $Ia\bar{3}d$ ,  $a = 12.9522(4)$  Å; fit statistics:  $\chi^2 = 1.659$ ;  $wRp = 0.0839$ ,  $Rp = 0.0637$ .

<sup>b</sup> The Ga-content was fixed at 0.285 mole per unit formula of LLSO, as determined from ICP-MS, and the sum of Li1+Li2 was constrained accordingly to maintain electrical neutrality (i.e.,  $Li_{6.15}Ga_{0.285}La_3Sn_2O_{12}$ ).

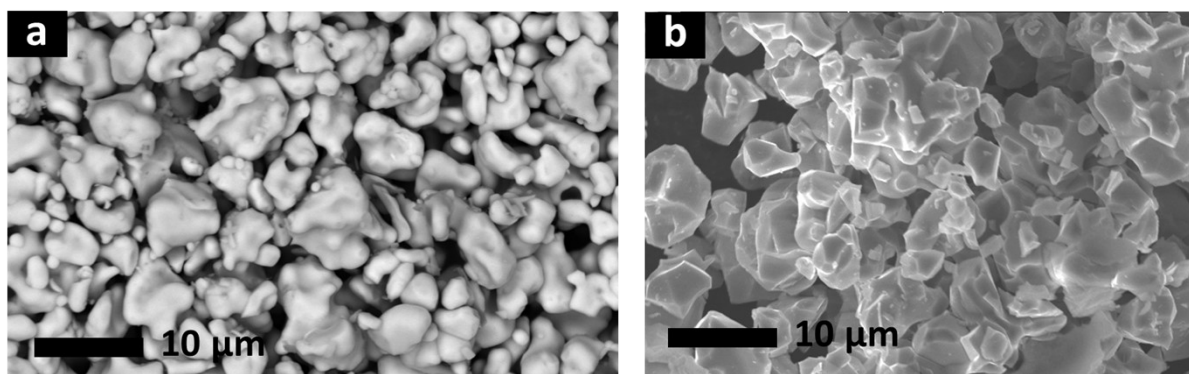

Figure S1. SEM images of 0.3Ga-doped LLSO prepared by sol-gel (a) and by solid-state reactions (b) methods.

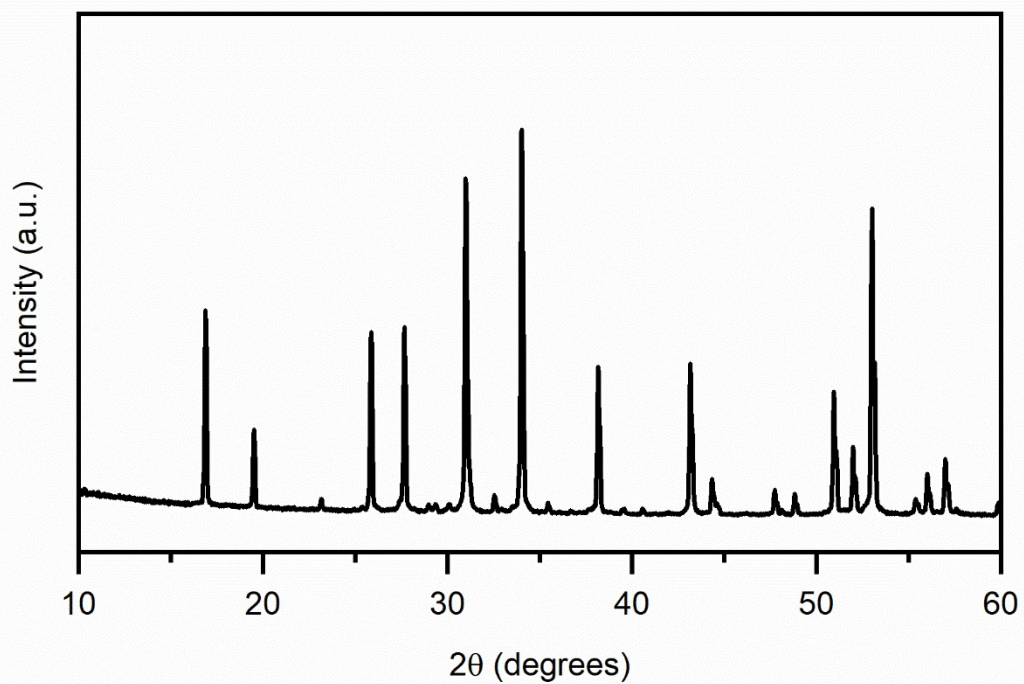

Figure S2. XRD pattern of 0.3Ga-doped LLSO synthesized by sol-gel technique and stored in air for several days.

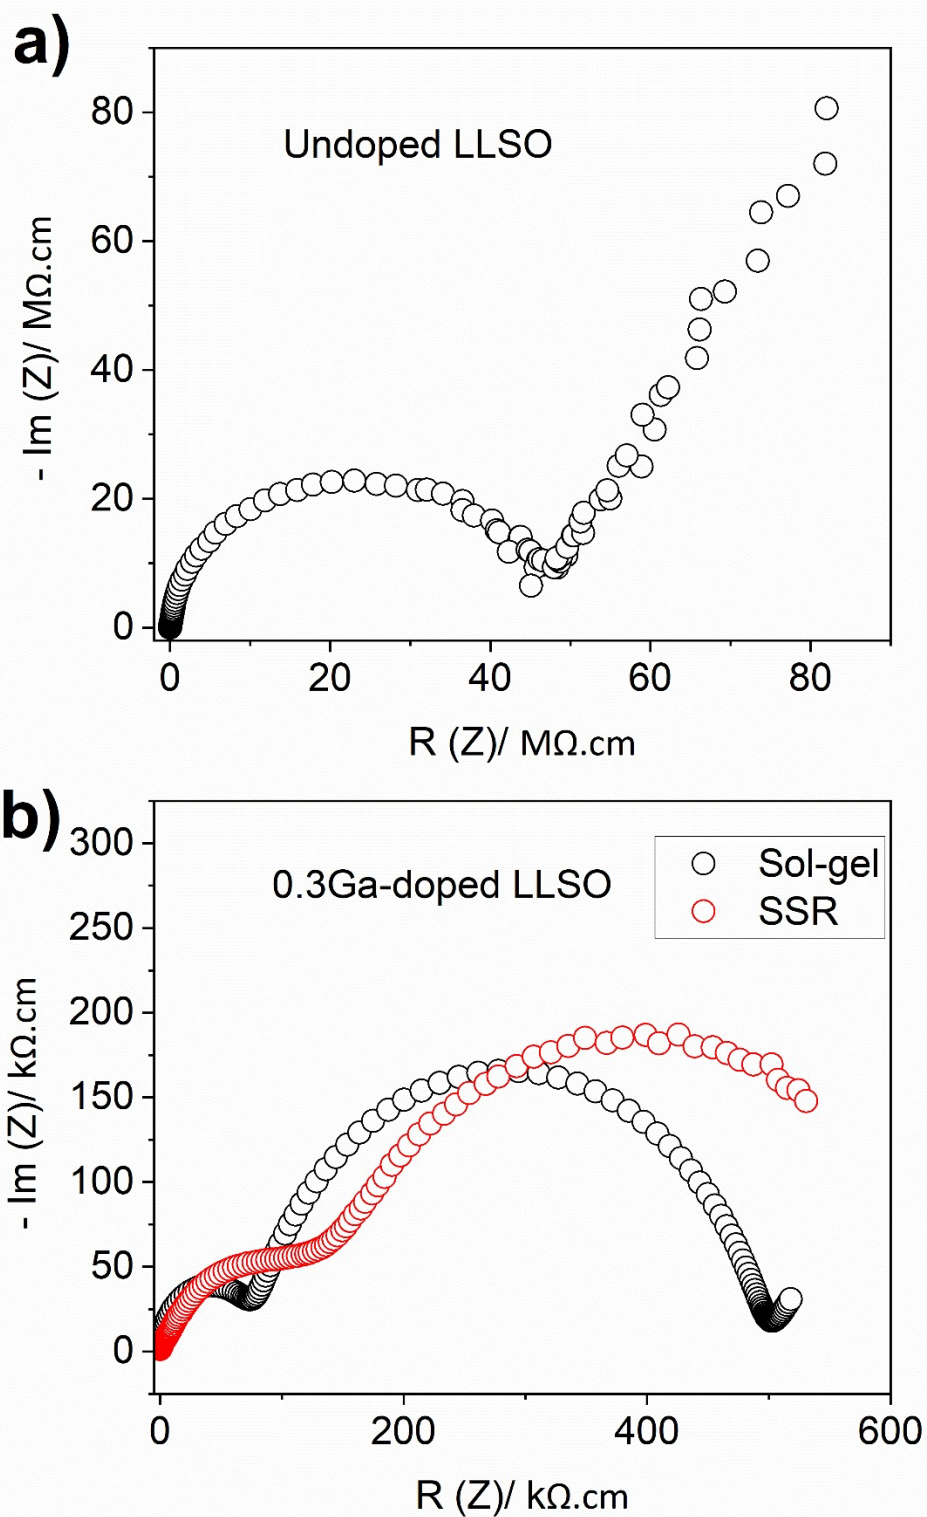

Figure S3. a) Impedance spectrum of undoped LLSO at 40 °C; total conductivity of  $\sim 2 \times 10^{-8} \text{ Scm}^{-1}$ . b) Impedance spectra of 0.3Ga-doped LLSO prepared by sol-gel and solid-state reaction (SSR) methods at 40 °C. The sample prepared by SSR showed slightly higher resistance than that prepared by sol-gel method.

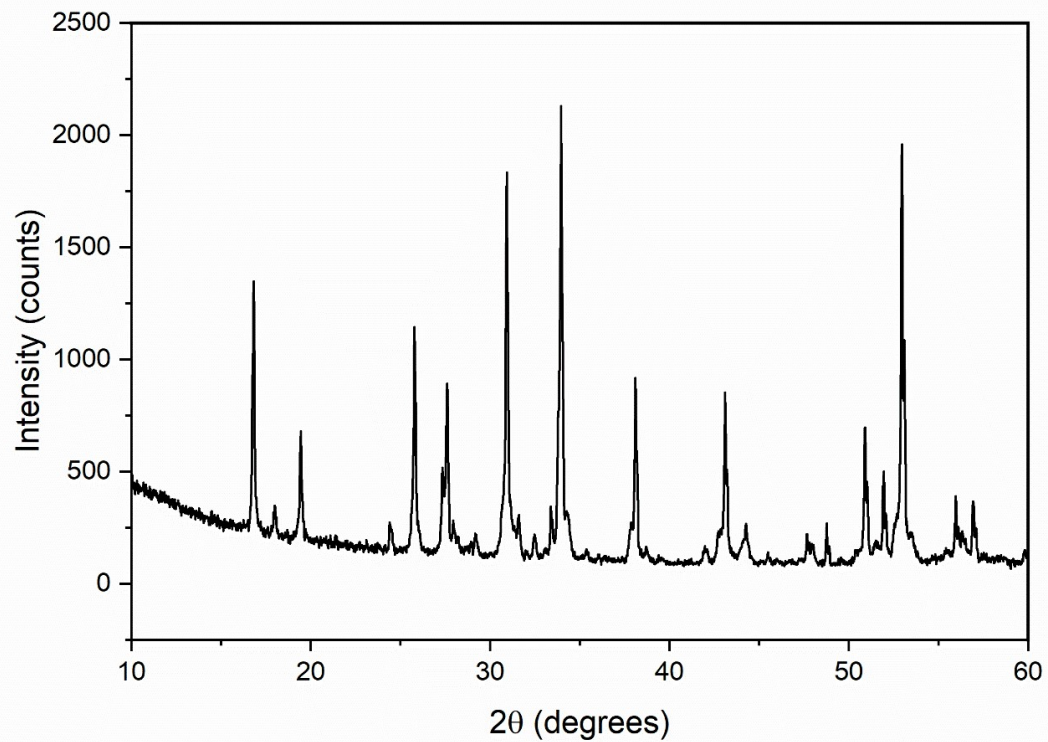

Figure S4. XRD pattern of 0.3Ga-doped LLSO synthesized by sol-gel technique and calcined at 1100°C.

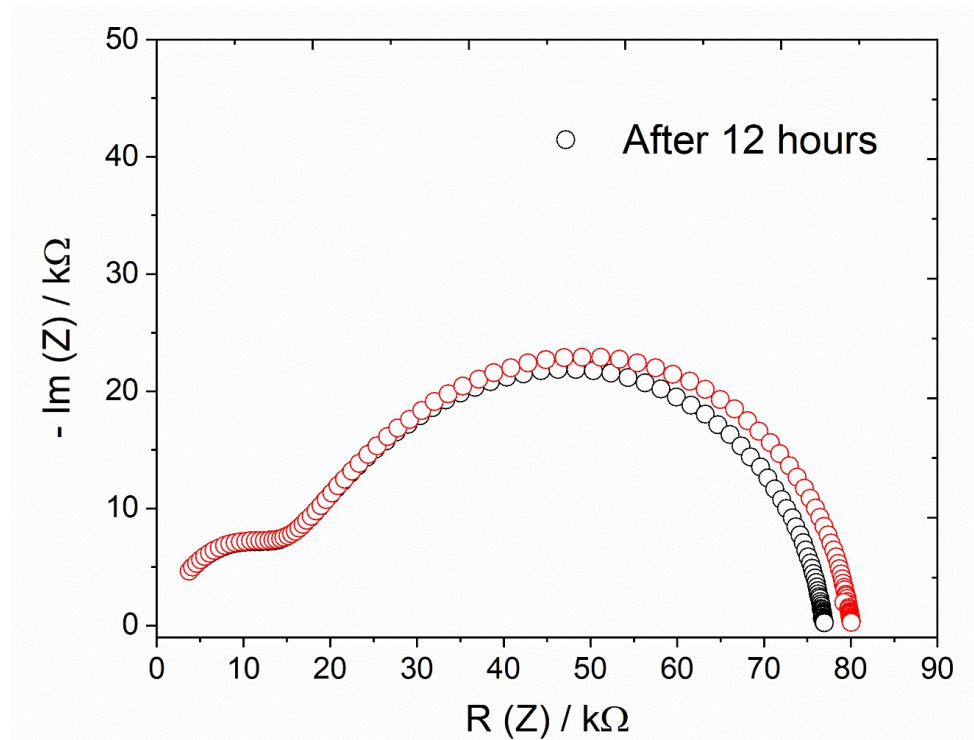

Figure S5. Impedance plots of hot-pressed 0.3Ga-doped LLSO collected at 40 °C using lithium electrodes.

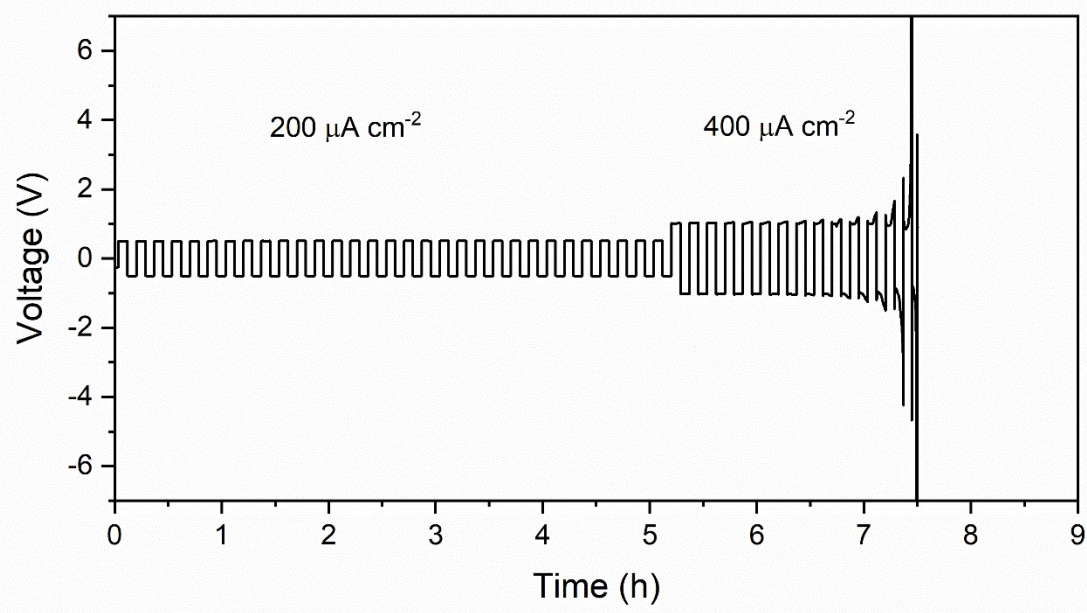

Figure S6. Galvanostatic cycling data of a Li/0.3Ga-LLSO/Li symmetric cell at 80 °C.
